# Supplementary material for: Age Prediction Using DNA Methylation Heterogeneity Metrics
Source: MDPI journal article supplement (doi:10.3390/ijms25094967), 2024-05-02
Supplement: s1 [file s1]

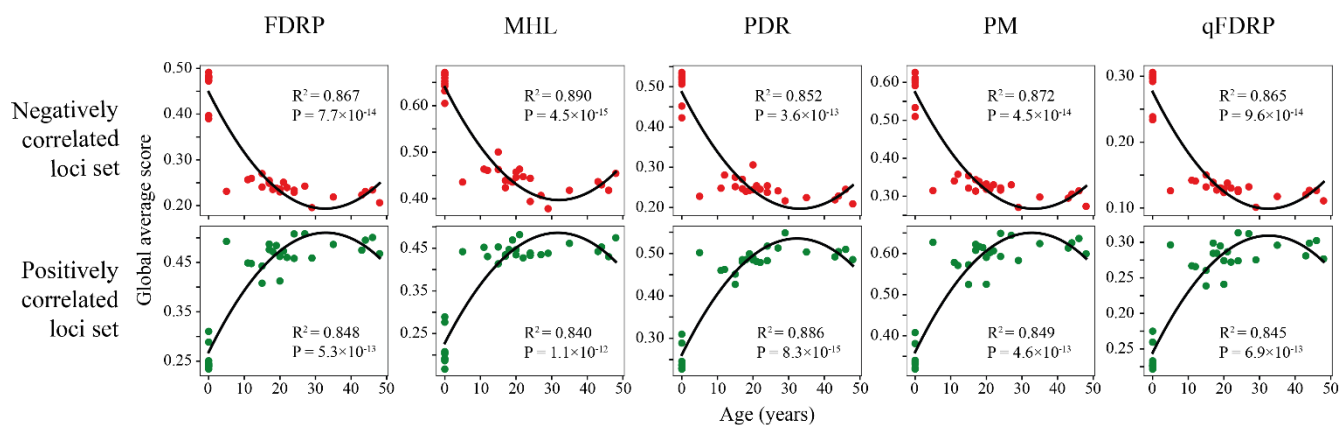

Figure S1. Age-dependent dynamics of the mean heterogeneity score over sets of loci with positively or negatively age-correlated metric values based on MSC RRBS datasets. Each point corresponds to the global average score over the entire set of heterogeneity loci per single sample.
