# Supplementary figures and images for: Age Prediction Using DNA Methylation Heterogeneity Metrics
Source: MDPI journal article supplement (doi:10.3390/ijms25094967), 2024-05-02

Negatively  
correlated  
loci set

FDRP

MHL

PDR

PM

qFDRP

Positively  
correlated  
loci set

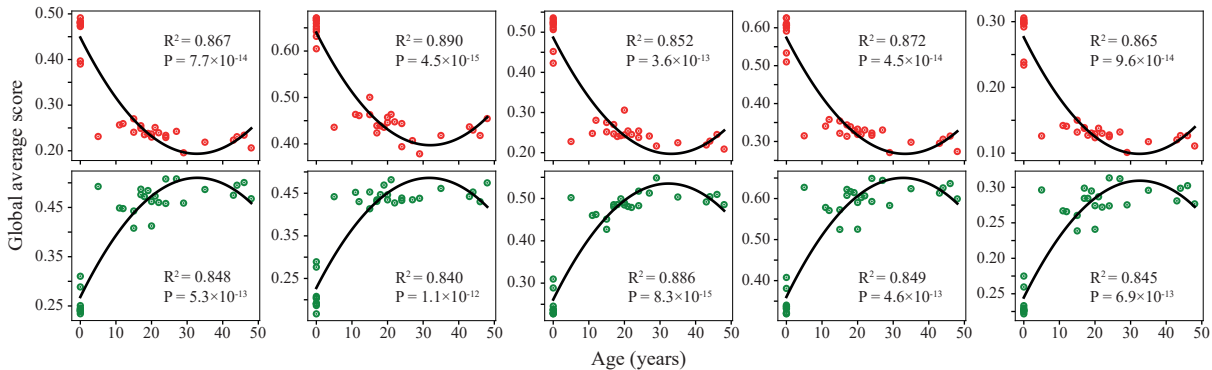

Supplement: s1 [file s1]
